# Supplementary material
Source: PubMed Central journal article supplement (PMC3719429)
Supplement: supp_WNL.0b013e3182919059_Figures_e-1-3.pdf [file supp_WNL.0b013e3182919059_Figures_e-1-3.pdf]

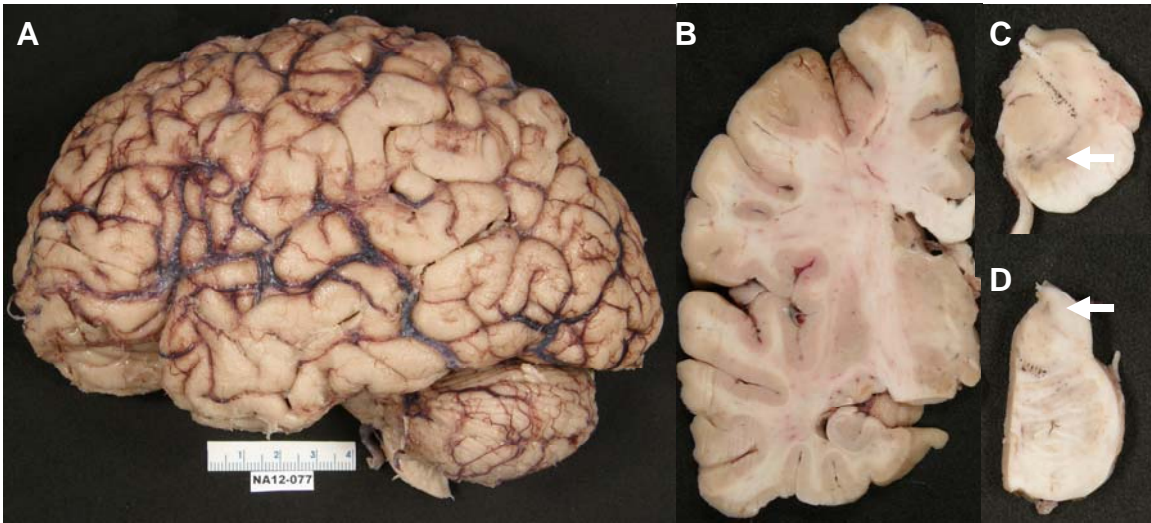

**Figure e-1. Macroscopic appearance of Case 1** (A) The left hemibrain appears normal. (B) A coronal section did not reveal any abnormalities. (C-D) Transverse sections of the midbrain (C) and pons (D) showed decreased pigmentation in the substantia nigra (arrow in C) and locus ceruleus (arrow in D).

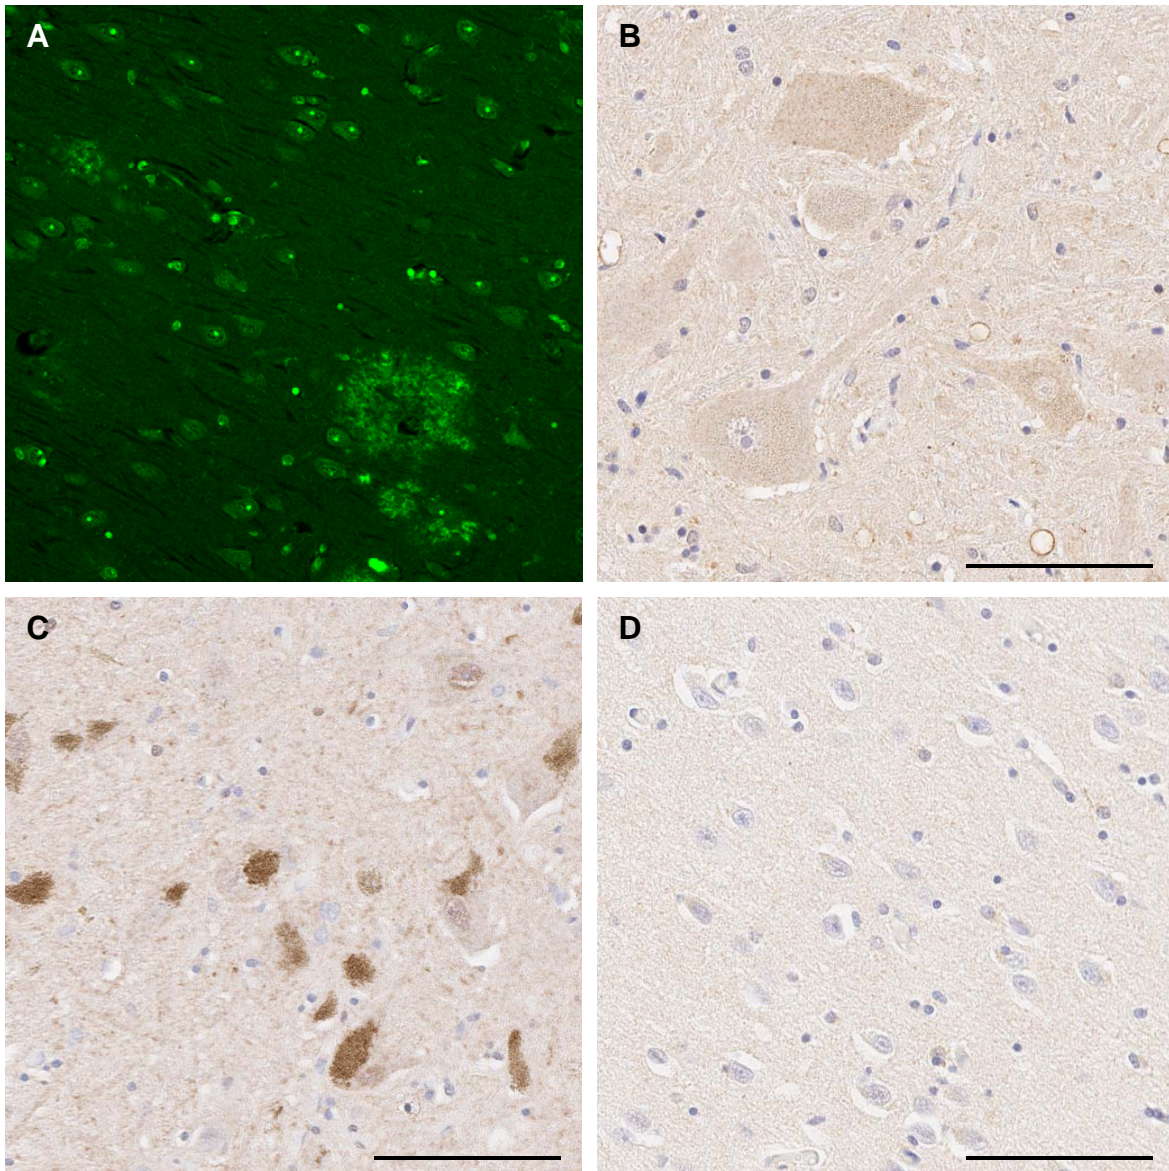

**Figure e-2. Histologic examination of additional pathologic proteins associated with neurodegenerative disease** (A) Thioflavin-S fluorescent microscopy showed mild senile changes of Alzheimer type. (B-D) Immunohistochemical staining did not detect SOD1 inclusions within the spinal cord (B), or  $\alpha$ -synuclein within the midbrain (C), FUS inclusions within the amygdala (D). Bar represents 100 $\mu$ m.

| <b>ALS</b>  | <b>ALS/FTLD</b> |                | <b>FTLD</b>   |
|-------------|-----------------|----------------|---------------|
| <b>SOD1</b> |                 |                |               |
| <b>VAPB</b> | <b>TARDBP</b>   |                |               |
| <b>OPTN</b> | <b>FUS/TLS</b>  | <b>C9ORF72</b> |               |
|             | <b>ANG</b>      | <b>VCP</b>     | <b>GRN</b>    |
|             |                 | <b>DCN1</b>    | <b>CHMP2B</b> |

**Figure e-3. Genes associated with adult onset, autosomal dominant ALS and FTLD may have overlapping clinical features**
